# Supplementary material for: Horizontal distribution of tropospheric NO 2 and aerosols derived by dual-scan multi-wavelength MAX-DOAS measurements in Uccle, Belgium
Source: Copernicus journal article supplement (doi:10.5194/amt-2021-308), 2021-10-18
Supplement: Supplementary file 1 [file amt-2021-308-supplement.pdf]

## Horizontal distribution of tropospheric NO<sub>2</sub> and aerosols derived by dual-scan multi-wavelength MAX-DOAS measurements in Uccle, Belgium

Table S1. DOAS settings for O<sub>4</sub> and NO<sub>2</sub> in the six different fitting intervals.

| Fitting window/ nm | Reference wavelength/ nm | Molecule                | Reference                                                                                                                         |
|--------------------|--------------------------|-------------------------|-----------------------------------------------------------------------------------------------------------------------------------|
| <b>330 – 361</b>   | 343                      | BrO (223 K)             | Fleischmann et al. (2004)                                                                                                         |
| <b>350 - 370</b>   | 360                      | O <sub>4</sub>          | Finkenzeller, H. (private communication)                                                                                          |
|                    |                          | NO <sub>2</sub> (298 K) | Vandaele et al. (1998) with I <sub>0</sub> correction (SCD of 10 <sup>17</sup> molec.cm <sup>-2</sup> )                           |
|                    |                          | O <sub>3</sub> (223 K)  | Serdyuchenko et al. (2014) with I <sub>0</sub> correction (SCD of 10 <sup>20</sup> molecules/cm <sup>2</sup> )                    |
|                    |                          | HCHO (297 K)            | Meller and Moortgat (2000)                                                                                                        |
|                    |                          | O <sub>3</sub> (243 K)  | Pre-orthogonalized Serdyuchenko et al. (2014) with I <sub>0</sub> correction (SCD of 10 <sup>20</sup> molecules/cm <sup>2</sup> ) |
|                    |                          | Ring                    | Pseudo cross-section according to Chance and Spurr (1997) and normalized as in Wagner et al. (2009)                               |
|                    |                          | Polynomial              | Order 3 (4 coefficients)                                                                                                          |
| <b>360-383.5</b>   | 380                      | BrO                     | Fleischmann et al. (2004)                                                                                                         |
|                    |                          | O <sub>4</sub>          | Finkenzeller, H. (private communication)                                                                                          |
|                    |                          | NO <sub>2</sub> (298 K) | Vandaele et al. (1998) with I <sub>0</sub> correction (SCD of 10 <sup>17</sup> molec.cm <sup>-2</sup> )                           |
|                    |                          | NO <sub>2</sub> (220 K) | Pre-orthogonalized Vandaele et al. (1998) with I <sub>0</sub> correction                                                          |
|                    |                          | Ring                    | Pseudo cross-section according to Chance and Spurr (1997) and normalized as in Wagner et al. (2009)                               |
|                    |                          | Polynomial              | Order 5 (6 coefficients)                                                                                                          |
| <b>420-460</b>     | 447                      | NO <sub>2</sub> (298 K) | Vandaele et al. (1998) with I <sub>0</sub> correction (SCD of 10 <sup>17</sup> molec.cm <sup>-2</sup> )                           |
| <b>450 - 490</b>   | 477                      |                         |                                                                                                                                   |
|                    |                          | O <sub>4</sub> (293 K)  | Thalman and Volkamer (2013)                                                                                                       |

|             |     |                         |                                                                                                                |
|-------------|-----|-------------------------|----------------------------------------------------------------------------------------------------------------|
| 510 – 540.1 | 530 | O <sub>3</sub> (223 K)  | Serdyuchenko et al. (2014) with I <sub>0</sub> correction (SCD of 10 <sup>20</sup> molecules/cm <sup>2</sup> ) |
|             |     | H <sub>2</sub> O        | HITRAN (Rothman et al., 2013)                                                                                  |
|             |     | NO <sub>2</sub> (220 K) | Pre-orthogonalized Vandaele et al. (1998) with I <sub>0</sub> correction                                       |
|             |     | Ring                    | Pseudo cross-section according to Chance and Spurr (1997) and normalized as in Wagner et al. (2009)            |
|             |     | Polynomial              | Order 3 (4 coefficients)                                                                                       |
|             |     | NO <sub>2</sub> (298 K) | Vandaele et al. (1998) with I <sub>0</sub> correction (SCD of 10 <sup>17</sup> molec.cm <sup>-2</sup> )        |
|             |     | O <sub>4</sub> (293 K)  | Thalman and Volkamer (2013)                                                                                    |
|             |     | O <sub>3</sub> (223 K)  | Serdyuchenko et al. (2014) with I <sub>0</sub> correction (SCD of 10 <sup>20</sup> molecules/cm <sup>2</sup> ) |
|             |     | H <sub>2</sub> O        | HITRAN (Rothman et al., 2013)                                                                                  |
|             |     | NO <sub>2</sub> (220 K) | Pre-orthogonalized Vandaele et al. (1998) with I <sub>0</sub> correction                                       |
|             |     | Ring                    | Pseudo cross-section according to Chance and Spurr (1997) and normalized as in Wagner et al. (2009)            |
|             |     | Polynomial              | Order 2 (3 coefficients)                                                                                       |

---

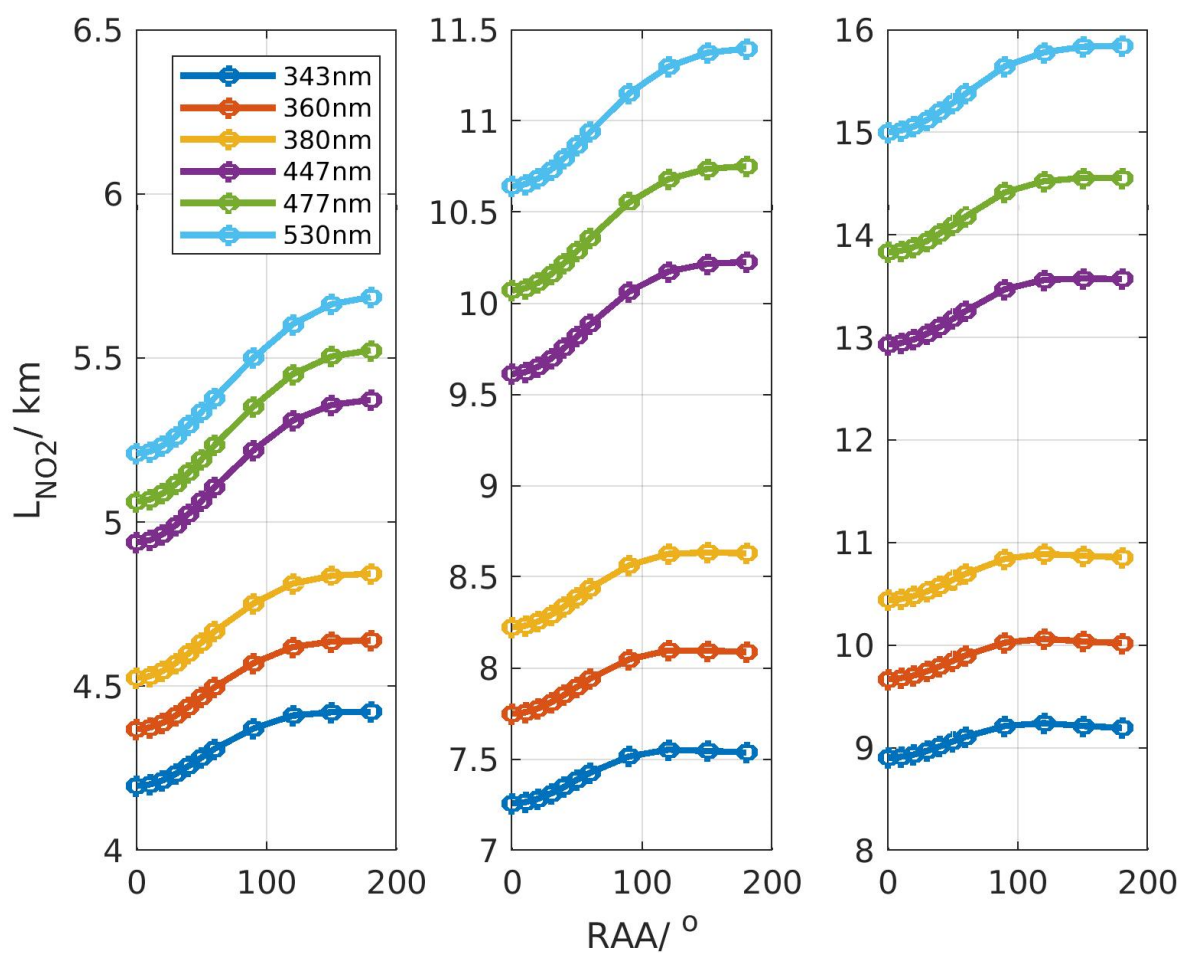

Figure S1. Simulated  $L_{NO_2}$  as a function of the RAA for different  $MLH_{NO_2}$  values (from left to right panel:  $MLH_{NO_2}$  equal to 500 m, 1000 m, and 1500 m), wavelengths, one SZA value ( $30^\circ$ ), and one AOD value (0.3).

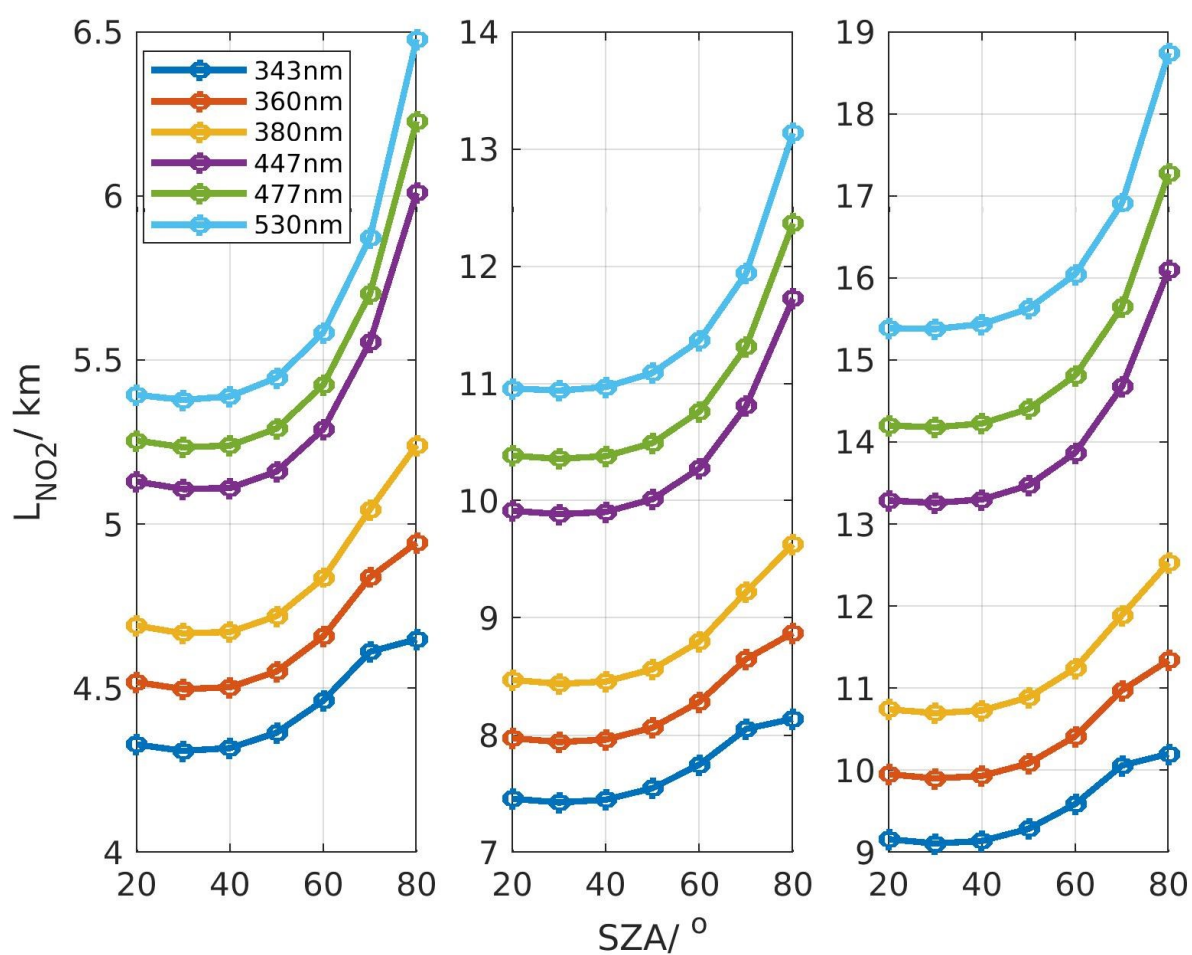

Figure S2. Simulated  $L_{NO_2}$  as a function of the SZA for different  $MLH_{NO_2}$  values (from left to right panel:  $MLH_{NO_2}$  equal to 500 m, 1000 m, and 1500 m), wavelengths, one RAA value (60°), and one AOD value (0.3).

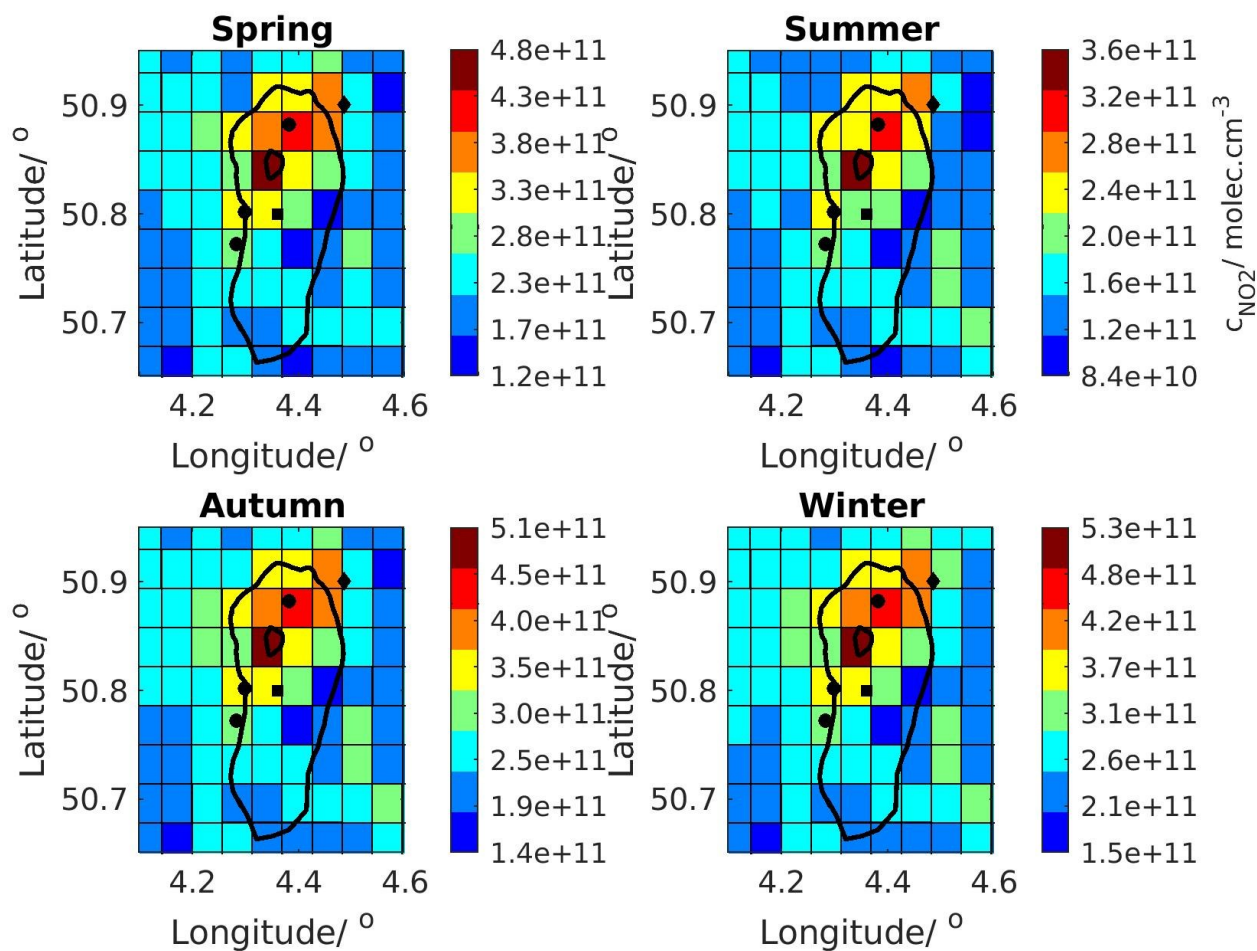

Figure S3. Seasonal near-surface NO<sub>2</sub> concentration grids as estimated over Brussels by the RIO air-quality model. The black square shows the MAX-DOAS position, the black polygon the National Airport, the black dots the NO<sub>2</sub> hotspots, and the black line represents the Brussels Ring motorway.

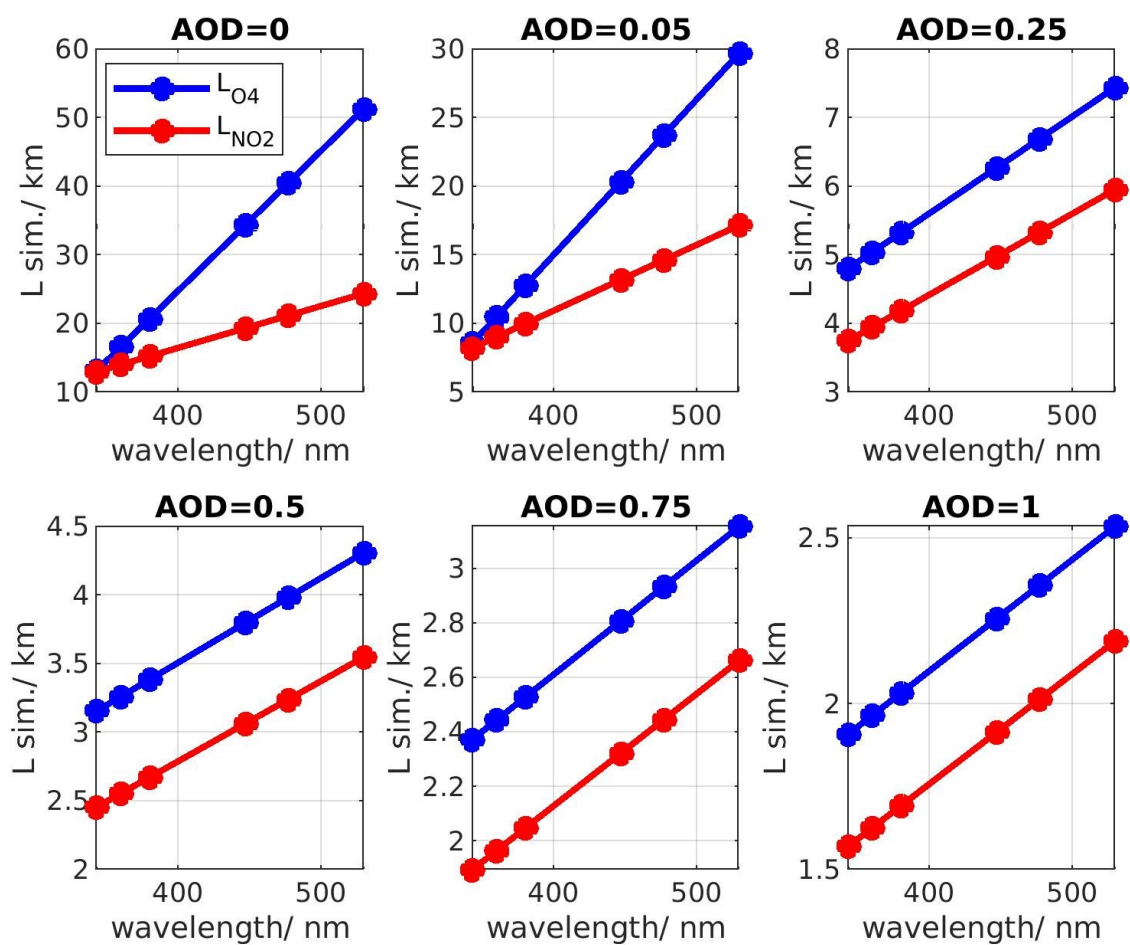

Figure S4. Simulated differential effective light path of O<sub>4</sub> dSCDs ( $L_{O4}$  sim.) and NO<sub>2</sub> dSCDs ( $L_{NO2}$  sim.) as a function of wavelength for different AOD scenarios.
